# Supplementary material for: Association of Total Flavonoid Intake with Hypo-HDL-Cholesterolemia among Korean Adults: Effect Modification by Polyunsaturated Fatty Acid Intake
Source: MDPI journal article supplement (doi:10.3390/nu12010195), 2020-01-10
Supplement: s1 [file s1]

**Supplementary Table S1.** Odds ratios and 95% confidence intervals for hypo-HDL-cholesterolemia in Korean adults according to the proanthocyanidins intake tertile after stratification by the dietary polyunsaturated fatty acid intake <sup>1,2,3</sup>.

|                | Men                                        |                  |                  |                    | Women                                 |                          |                  |                  |                    |                          |
|----------------|--------------------------------------------|------------------|------------------|--------------------|---------------------------------------|--------------------------|------------------|------------------|--------------------|--------------------------|
|                | Proanthocyanidins Intake                   |                  |                  | <i>p</i> for Trend | <i>p</i> for Interaction <sup>4</sup> | Proanthocyanidins Intake |                  |                  | <i>p</i> for Trend | <i>p</i> for Interaction |
|                | T1                                         | T2               | T3               |                    |                                       | T1                       | T2               | T3               |                    |                          |
|                | Total PUFA intake                          |                  |                  |                    |                                       |                          |                  |                  |                    |                          |
| Low (<median)  | 1.00 (ref)                                 | 0.76 (0.55-1.03) | 0.73 (0.54-1.00) | 0.1626             | 0.6622                                | 1.00 (ref)               | 1.02 (0.82-1.28) | 0.95 (0.76-1.18) | 0.5255             | 0.7890                   |
| High (≥median) | 1.00 (ref)                                 | 0.87 (0.63-1.20) | 0.74 (0.54-1.02) | 0.0947             |                                       | 1.00 (ref)               | 0.97 (0.76-1.23) | 0.95 (0.76-1.21) | 0.7437             |                          |
|                | <i>n</i> -6 PUFA intake                    |                  |                  |                    |                                       |                          |                  |                  |                    |                          |
| Low (<median)  | 1.00 (ref)                                 | 0.77 (0.57-1.05) | 0.72 (0.53-0.97) | 0.0935             | 0.8932                                | 1.00 (ref)               | 1.01 (0.80-1.27) | 0.99 (0.79-1.23) | 0.8685             | 0.8376                   |
| High (≥median) | 1.00 (ref)                                 | 0.85 (0.61-1.17) | 0.77 (0.56-1.07) | 0.2028             |                                       | 1.00 (ref)               | 0.99 (0.78-1.25) | 0.91 (0.72-1.16) | 0.4302             |                          |
|                | <i>n</i> -3 PUFA intake                    |                  |                  |                    |                                       |                          |                  |                  |                    |                          |
| Low (<median)  | 1.00 (ref)                                 | 0.78 (0.58-1.06) | 0.82 (0.60-1.13) | 0.5015             | 0.2360                                | 1.00 (ref)               | 1.05 (0.84-1.31) | 0.92 (0.73-1.16) | 0.3363             | 0.5594                   |
| High (≥median) | 1.00 (ref)                                 | 0.84 (0.62-1.15) | 0.66 (0.49-0.89) | 0.0120             |                                       | 1.00 (ref)               | 0.94 (0.74-1.20) | 0.98 (0.78-1.24) | 0.9608             |                          |
|                | <i>n</i> -6/ <i>n</i> -3 PUFA intake ratio |                  |                  |                    |                                       |                          |                  |                  |                    |                          |
| Low (<median)  | 1.00 (ref)                                 | 0.79 (0.56-1.10) | 0.68 (0.50-0.93) | 0.0451             | 0.9018                                | 1.00 (ref)               | 1.10 (0.87-1.38) | 1.04 (0.84-1.30) | 0.9991             | 0.2878                   |
| High (≥median) | 1.00 (ref)                                 | 0.84 (0.62-1.14) | 0.79 (0.57-1.09) | 0.2564             |                                       | 1.00 (ref)               | 0.89 (0.71-1.11) | 0.86 (0.68-1.10) | 0.3376             |                          |

<sup>1</sup>Dietary intakes of proanthocyanidins and polyunsaturated fatty acids were adjusted for energy intake using the residual method; <sup>2</sup>Odds ratios and 95% confidence intervals were adjusted for age, BMI, serum triglyceride level, alcohol consumption, smoking status, household income, education level, and energy intake; <sup>3</sup>Hypo-HDL-cholesterolemia was defined as serum HDL-cholesterol < 40 mg/dL for men and < 50 mg/dL for women; <sup>4</sup>*p* for interaction values were obtained by Wald tests of the cross-product of proanthocyanidins intake categories (tertile 1, 2 and 3) and polyunsaturated fatty acids intake categories (<median, ≥median) (all ordinal variables; 1 degree of freedom); Abbreviations: HDL: high density lipoprotein; OR: odds ratio; CI: confidence interval; ref: reference; PUFA: polyunsaturated fatty acid; T1, T2, and T3: tertile 1, 2 and 3.
